# Supplementary material
Source: Springer Nature journal article supplement (https://www.springermedizin.de/resource/supplementary/12887_2012_775_MOESM1_ESM.pdf/9476208)

H

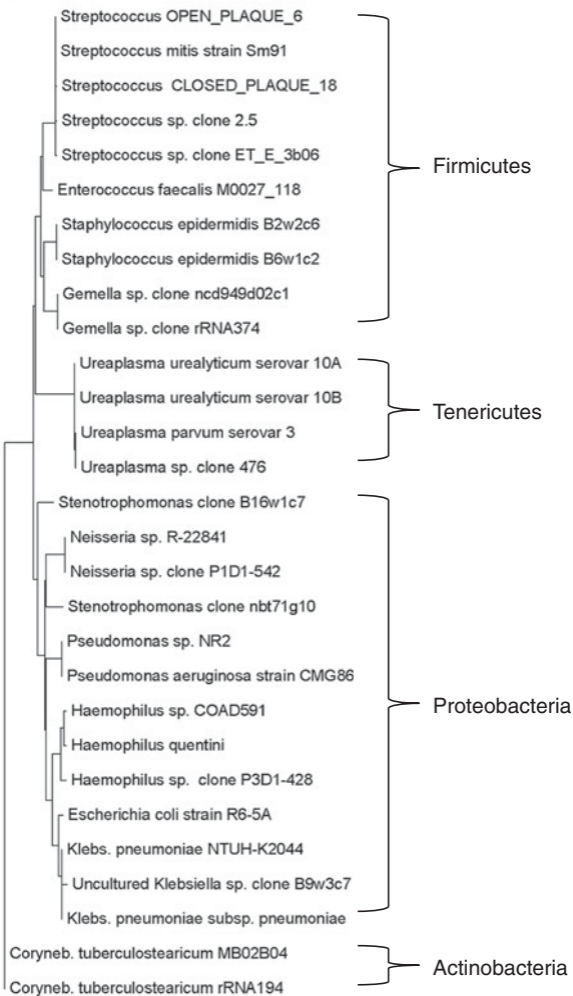

Supplement: MOESM1 [file 9476208]
